# Supplementary material for: Pathways through which intermittent preventive treatment for malaria in pregnancy influences child growth faltering: a mediation analysis
Source: PubMed Central journal article supplement — medRxiv. 2024 Jun 10:2024.06.09.24308656. Preprint. [Version 1] doi: 10.1101/2024.06.09.24308656 (PMC11213035; doi:10.1101/2024.06.09.24308656), 2024-06-10
Supplement: NIHPP2024.06.09.24308656v1-supplement-1.pdf [file NIHPP2024.06.09.24308656v1-supplement-1.pdf]

## SUPPLEMENT

**Table S1. Inflammation-related proteins included in each analysis**

|                | Passed LOD* check | Significant† intervention-mediator results | Significant† mediator-outcome results | Included in the mediation analysis |
|----------------|-------------------|--------------------------------------------|---------------------------------------|------------------------------------|
| IL8            | √                 |                                            |                                       |                                    |
| VEGFA          | √                 |                                            | √                                     |                                    |
| CD8A           | √                 |                                            | √                                     |                                    |
| MCP-3          |                   |                                            |                                       |                                    |
| GDNF           |                   |                                            |                                       |                                    |
| CDCP1          | √                 | √                                          | √                                     | √                                  |
| CD244          | √                 | √                                          | √                                     | √                                  |
| IL7            | √                 |                                            | √                                     |                                    |
| OPG            | √                 | √                                          | √                                     | √                                  |
| LAP TGF-beta-1 | √                 |                                            | √                                     |                                    |
| uPA            | √                 |                                            | √                                     |                                    |
| IL6            | √                 |                                            | √                                     |                                    |
| IL-17C         | √                 |                                            | √                                     |                                    |
| MCP-1          | √                 |                                            | √                                     |                                    |
| IL-17A         |                   |                                            |                                       |                                    |
| CXCL11         | √                 |                                            | √                                     |                                    |
| AXIN1          | √                 |                                            | √                                     |                                    |
| TRAIL          | √                 |                                            | √                                     |                                    |
| IL-20RA        |                   |                                            |                                       |                                    |
| CXCL9          | √                 |                                            |                                       |                                    |
| CST5           | √                 |                                            | √                                     |                                    |
| IL-2RB         |                   |                                            |                                       |                                    |
| IL-1 alpha     |                   |                                            |                                       |                                    |
| OSM            | √                 |                                            | √                                     |                                    |
| IL2            |                   |                                            |                                       |                                    |
| CXCL1          | √                 |                                            | √                                     |                                    |
| TSLP           |                   |                                            |                                       |                                    |
| CCL4           | √                 |                                            | √                                     |                                    |
| CD6            | √                 | √                                          | √                                     | √                                  |
| SCF            | √                 | √                                          | √                                     | √                                  |
| IL18           | √                 | √                                          | √                                     | √                                  |
| SLAMF1         |                   |                                            |                                       |                                    |
| TGF-alpha      | √                 |                                            | √                                     |                                    |
| MCP-4          | √                 |                                            | √                                     |                                    |
| CCL11          | √                 | √                                          | √                                     | √                                  |

|           |   |   |   |   |
|-----------|---|---|---|---|
| TNFSF14   | √ |   | √ |   |
| FGF-23    |   |   |   |   |
| IL-10RA   |   |   |   |   |
| FGF-5     |   |   |   |   |
| MMP-1     | √ |   |   |   |
| LIF-R     | √ |   | √ |   |
| FGF-21    | √ |   | √ |   |
| CCL19     | √ | √ | √ | √ |
| IL-15RA   |   |   |   |   |
| IL-10RB   | √ | √ |   |   |
| IL-22 RA1 |   |   |   |   |
| IL-18R1   | √ |   | √ |   |
| PD-L1     | √ |   | √ |   |
| Beta-NGF  |   |   |   |   |
| CXCL5     | √ |   | √ |   |
| TRANCE    | √ |   | √ |   |
| HGF       | √ |   | √ |   |
| IL-12B    | √ |   | √ |   |
| IL-24     |   |   |   |   |
| IL13      |   |   |   |   |
| ARTN      |   |   |   |   |
| MMP-10    | √ |   | √ |   |
| IL10      | √ | √ | √ | √ |
| TNF       | √ |   | √ |   |
| CCL23     | √ |   | √ |   |
| CD5       | √ | √ | √ | √ |
| CCL3      | √ |   | √ |   |
| Fit3L     | √ |   |   |   |
| CXCL6     | √ |   | √ |   |
| CXCL10    | √ |   | √ |   |
| 4E-BP1    | √ |   | √ |   |
| IL-20     |   |   |   |   |
| SIRT2     | √ |   | √ |   |
| CCL28     | √ | √ | √ | √ |
| DNER      | √ | √ | √ | √ |
| EN-RAGE   | √ |   | √ |   |
| CD40      | √ |   | √ |   |
| IL33      |   |   |   |   |
| IFN-gamma | √ |   | √ |   |
| FGF-19    | √ |   | √ |   |

|         |   |   |   |   |
|---------|---|---|---|---|
| IL4     |   |   |   |   |
| LIF     |   |   |   |   |
| NRTN    |   |   |   |   |
| MCP-2   | √ |   | √ |   |
| CASP-8  | √ |   | √ |   |
| CCL25   | √ |   |   |   |
| CX3CL1  | √ | √ |   |   |
| TNFRSF9 | √ | √ | √ | √ |
| NT-3    |   |   |   |   |
| TWEAK   | √ | √ | √ | √ |
| CCL20   | √ |   |   |   |
| ST1A1   | √ |   | √ |   |
| STAMPB  | √ |   | √ |   |
| IL5     |   |   |   |   |
| ADA     | √ | √ | √ | √ |
| TNFB    | √ |   |   |   |
| CSF-1   | √ |   | √ |   |

\* LOD: limit of detection

† p-value not accounting for multiple testing < 0.05

## Supplement 1. List of deviations from pre-analysis plan

The analysis plan for this study was pre-specified at <https://osf.io/f8wy4/>. We note the following deviations from the plan:

1. We intended to employ principal components analysis and established pathway analysis and term enrichment databases, such as Blood Transcriptional Modules, Gene Ontology, and KEGG, to reduce the dimensionality and identify clusters of Olink inflammation-related biomarkers. However, these approaches did not yield discernible clusters. Therefore, we adhered to parametric regression, t-tests, volcano plots, and forest plots to investigate individual biomarkers. These approaches allowed us to systematically identify and track individual biomarkers demonstrating evidence of associations with the interventions and child growth outcomes for subsequent inclusion in our mediation models.
2. The hypothesized causal pathways of the study as depicted in Figure S1 were sequential. However, due to limitations in available R programming tools, we decided to focus on single-mediator models to examine each intervention-mediator-outcome combination separately.

**Figure S1. Directed acyclic graph**

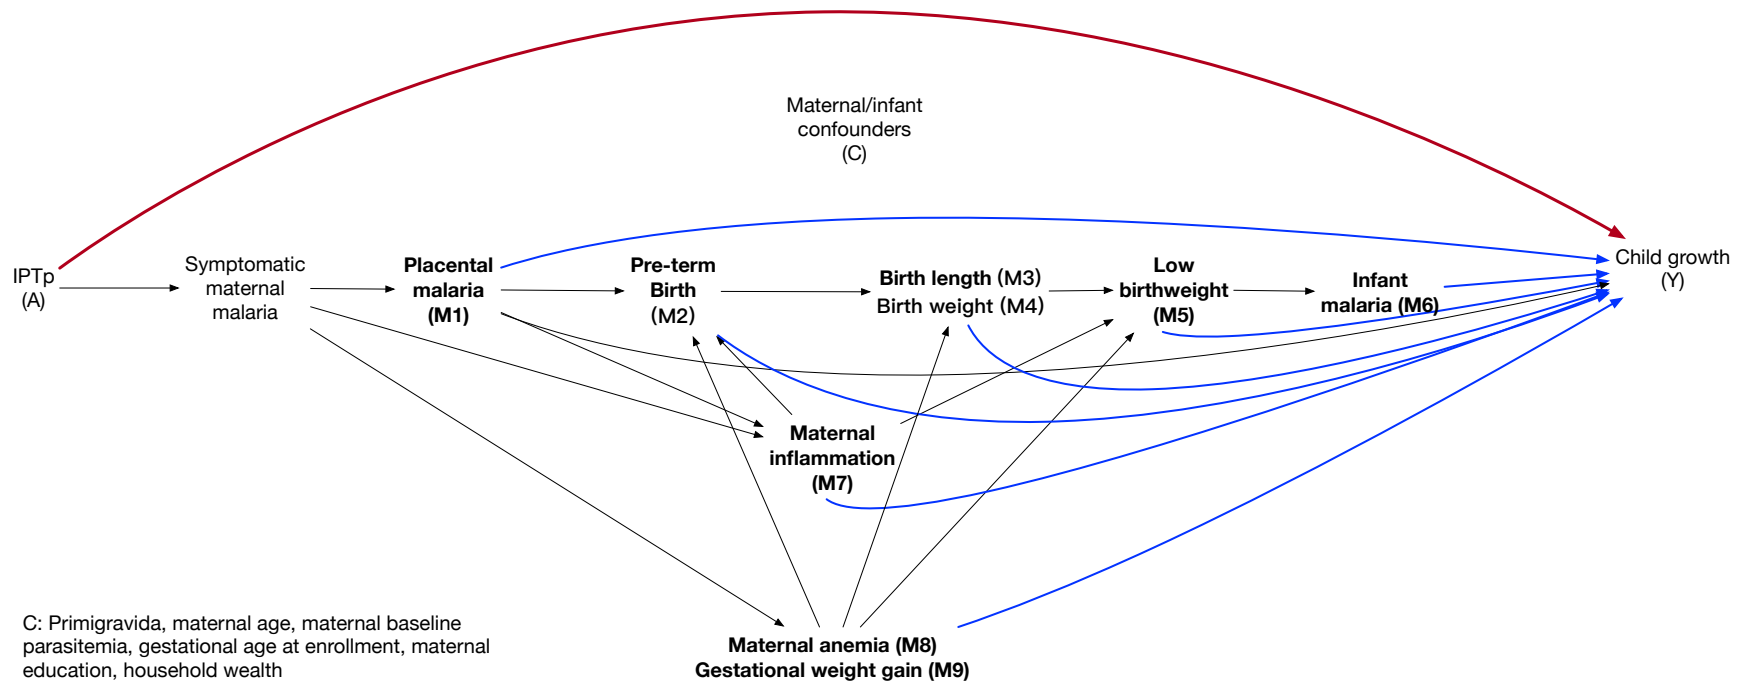

Note: all adjusted analyses in this study were controlled for the confounder set C, so for simplicity, the corresponding arrows were omitted.

Figure S2. Flowchart

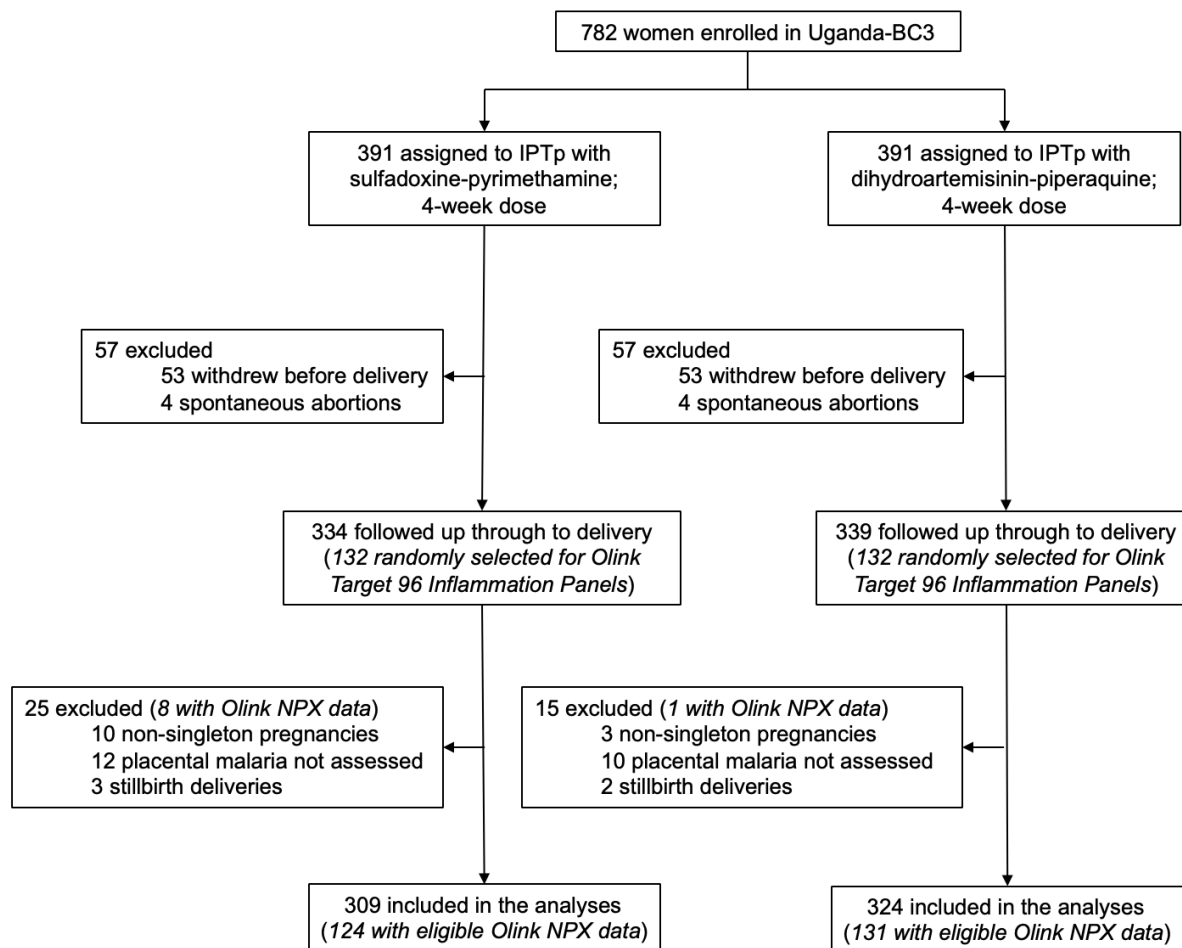

**Table S2. Total effect of IPTp-DP vs. IPTp-SP on stunting and wasting incidence**

| Age category    | DP  |                    | SP  |                    | Unadjusted incidence ratio (95% CI) |
|-----------------|-----|--------------------|-----|--------------------|-------------------------------------|
|                 | N   | Incidence (95% CI) | N   | Incidence (95% CI) |                                     |
| <b>Stunting</b> |     |                    |     |                    |                                     |
| Birth           | 324 | 18.2 (14.4, 22.8)  | 309 | 14.2 (10.8, 18.6)  | 1.28 (0.87, 1.89)                   |
| 1 day-3 months  | 262 | 26.0 (21.0, 31.6)  | 260 | 20.0 (15.6, 25.3)  | 1.30 (0.90, 1.86)                   |
| >3-6 months     | 182 | 10.4 (6.8, 15.7)   | 197 | 8.6 (5.5, 13.4)    | 1.21 (0.63, 2.33)                   |
| >6-9 months     | 160 | 8.1 (4.8, 13.4)    | 175 | 8.6 (5.3, 13.7)    | 0.95 (0.45, 1.99)                   |
| >9-12 months    | 147 | 4.8 (2.3, 9.5)     | 153 | 2.0 (0.7, 5.6)     | 2.43 (0.63, 9.39)                   |
| <b>Wasting</b>  |     |                    |     |                    |                                     |
| Birth           | 324 | 2.5 (1.3, 4.8)     | 309 | 2.9 (1.5, 5.4)     | 0.85 (0.33, 2.20)                   |
| 1 day-3 months  | 312 | 12.5 (9.3, 16.6)   | 295 | 12.9 (9.5, 17.2)   | 0.97 (0.62, 1.52)                   |
| >3-6 months     | 259 | 4.2 (2.4, 7.4)     | 242 | 3.3 (1.7, 6.4)     | 1.28 (0.52, 3.19)                   |
| >6-9 months     | 244 | 2.5 (1.1, 5.3)     | 225 | 2.7 (1.2, 5.7)     | 0.92 (0.30, 2.86)                   |
| >9-12 months    | 236 | 2.5 (1.2, 5.4)     | 211 | 2.8 (1.3, 6.1)     | 0.89 (0.29, 2.77)                   |

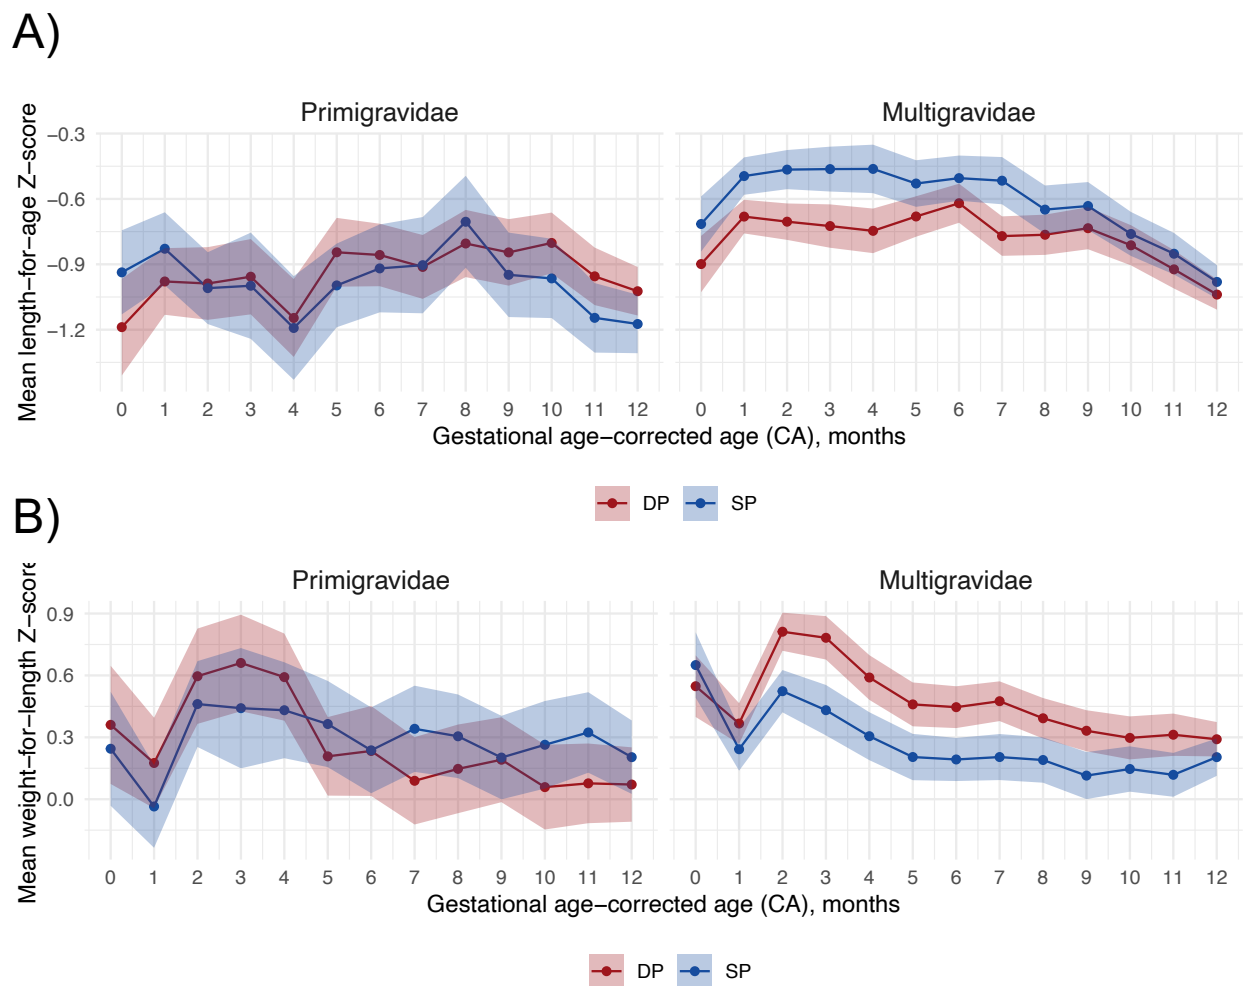

**Figure S3 Total effect of IPTp DP vs. SP on mean child growth Z-scores corrected for gestational age by child age and gravidity**

Includes 630 children measured from birth to 12 months. Excludes children with negative ages after gestational age correction.



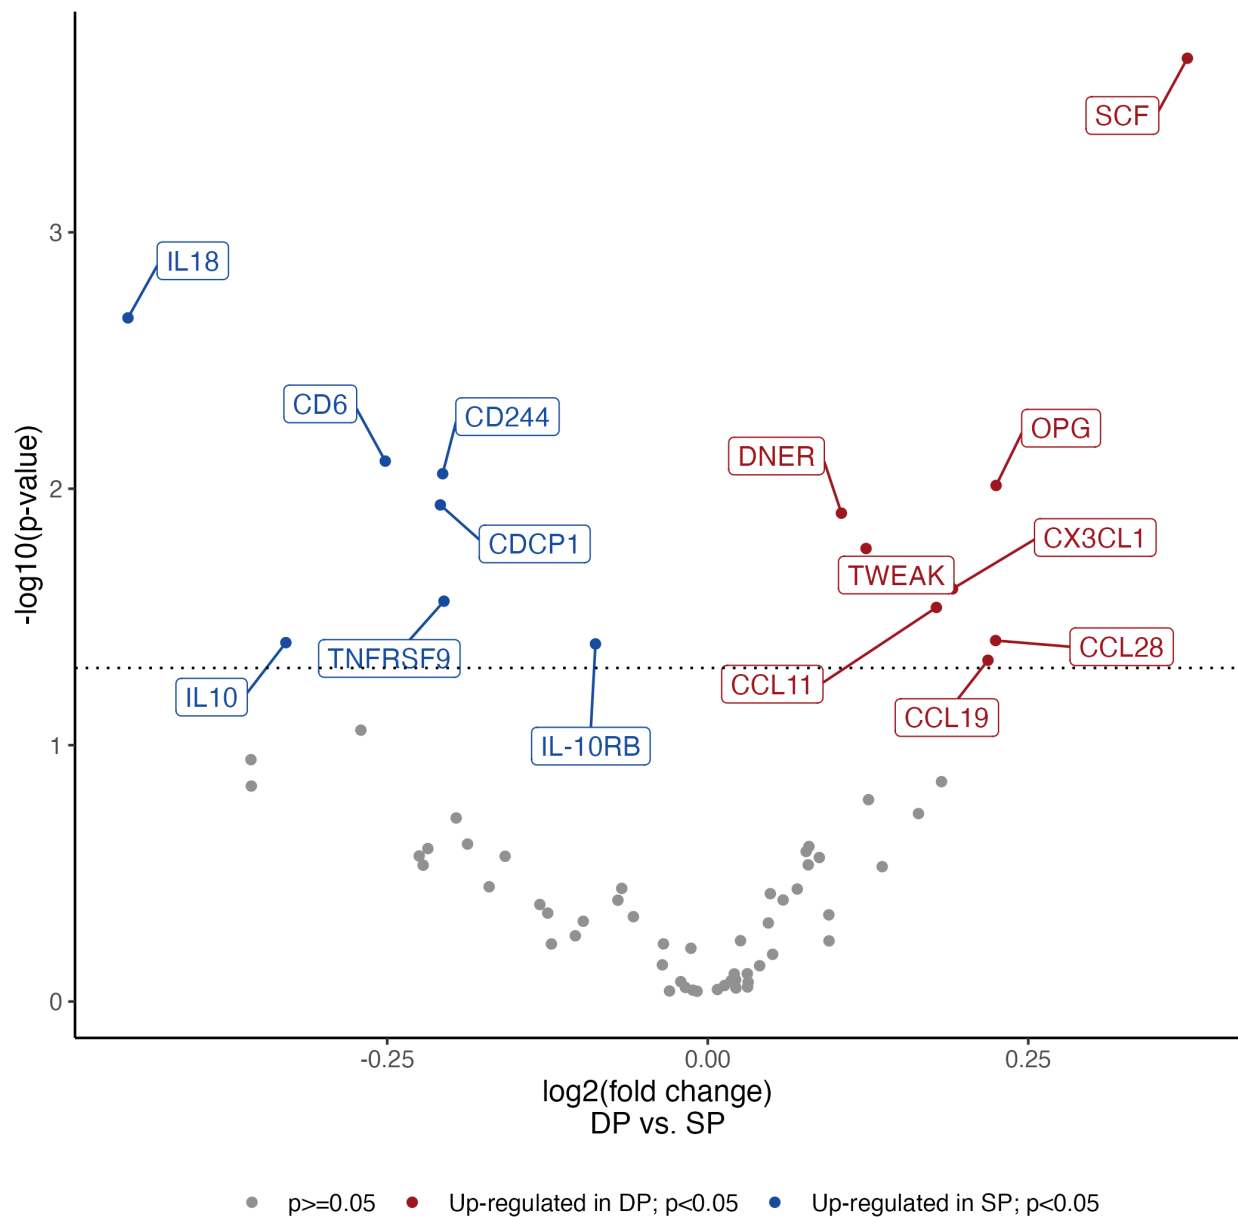

**Figure S4. Volcano plot of maternal inflammation-related proteins at delivery by IPTp-DP vs. IPTp-SP among all gravidae**

Red points represent proteins upregulated in DP with  $p < 0.05$ , blue points represent proteins upregulated in SP with  $p < 0.05$ , and gray points represent non-differentially expressed proteins. Color coding in the plot is based on p-values that were not corrected for multiple testing. After the Benjamini-Hochberg correction (false discovery rate  $p$ -value  $< 0.05$ ), only SCF had a  $p$ -value  $< 0.05$ . Among all gravidae, proteins upregulated in SP were IL18, CD6, CD244, CDCP1, TNFRSF9, IL10, and IL-10RB; proteins upregulated in DP were SCF, OPG, DNER, TWEAK, CX3CL1, CCL11, CCL28, and CCL19. Note that among primigravidae (sample size = 51), proteins CD5 and ADA were upregulated in SP, which were not shown on this volcano plot.

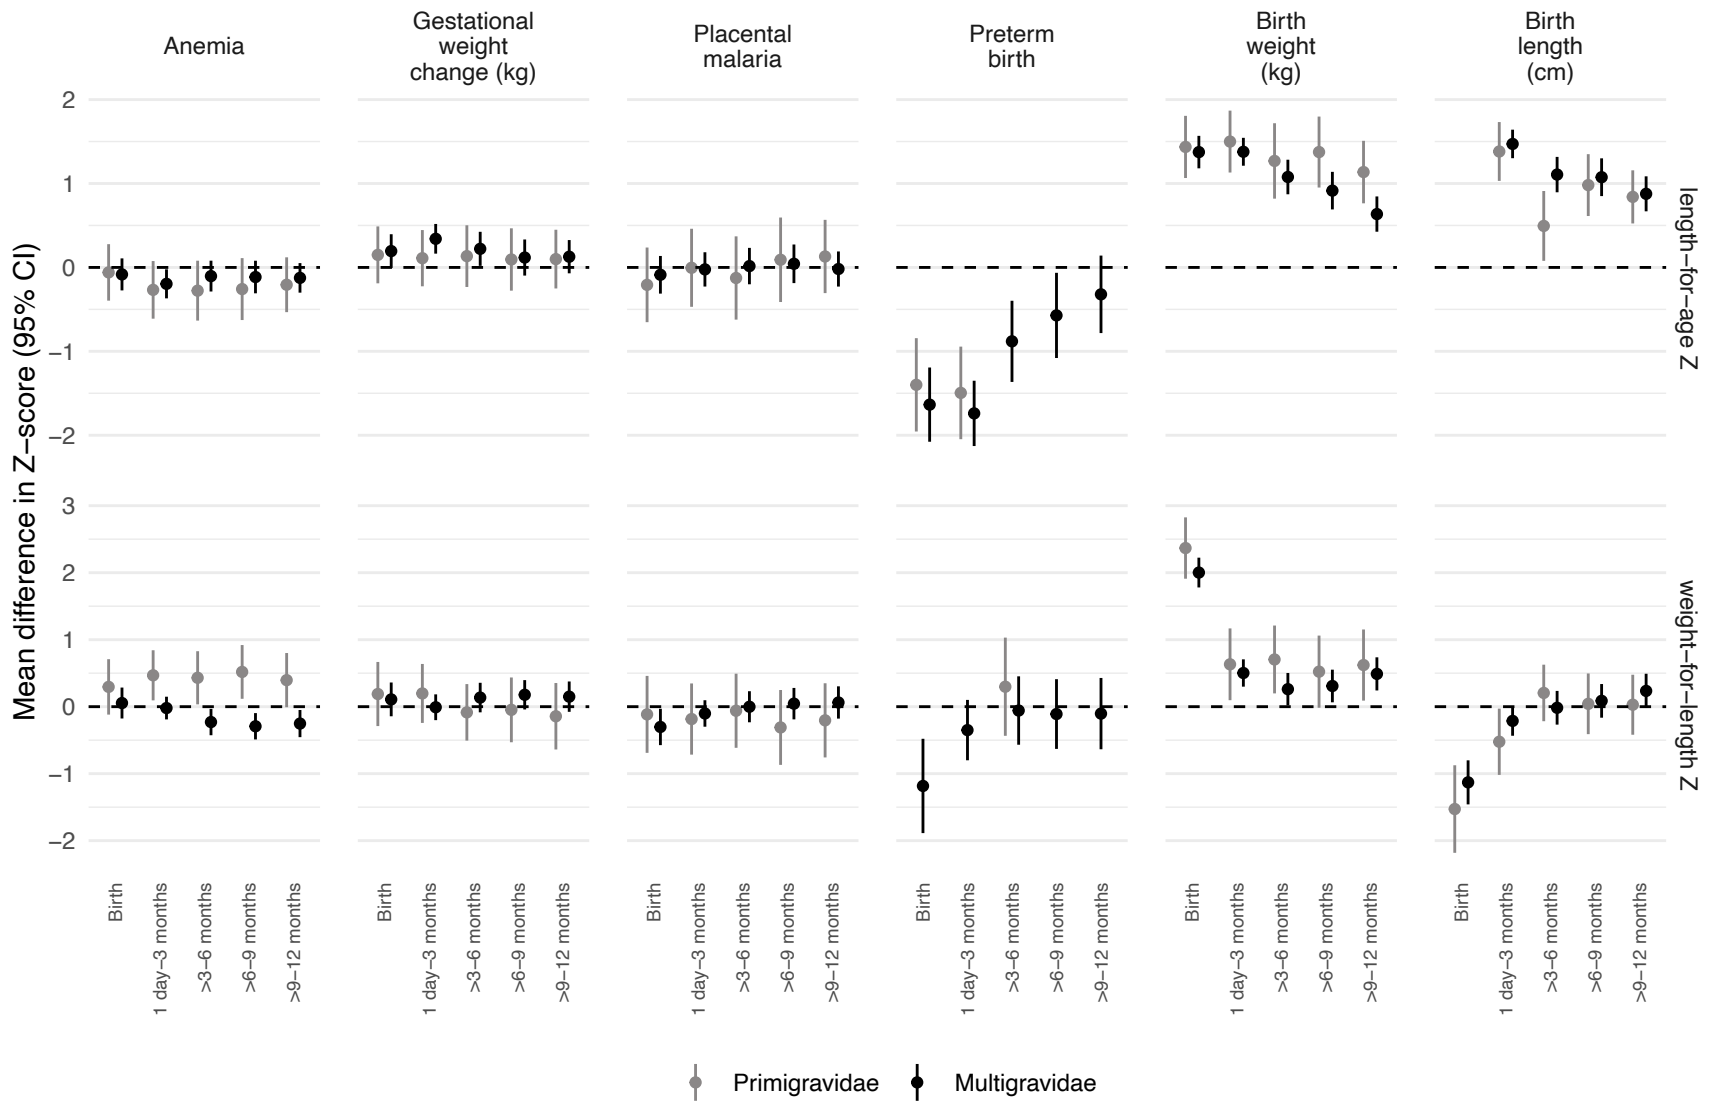

Figure S5. Associations between potential non-inflammation-related mediators and mean child growth Z-scores

Mean differences in Z-scores between each mediator and mean Z-scores adjusted by infant sex, maternal age, maternal baseline parasitemia, gestational age at enrollment, gravidity, maternal education, and household wealth.

Note: Gestational weight change and birth length values have been rescaled (multiplied by a factor of 5) to enhance clarity and visualization on the plot. This adjustment aligns their y-axis range with the other mediators for a more visually coherent presentation.

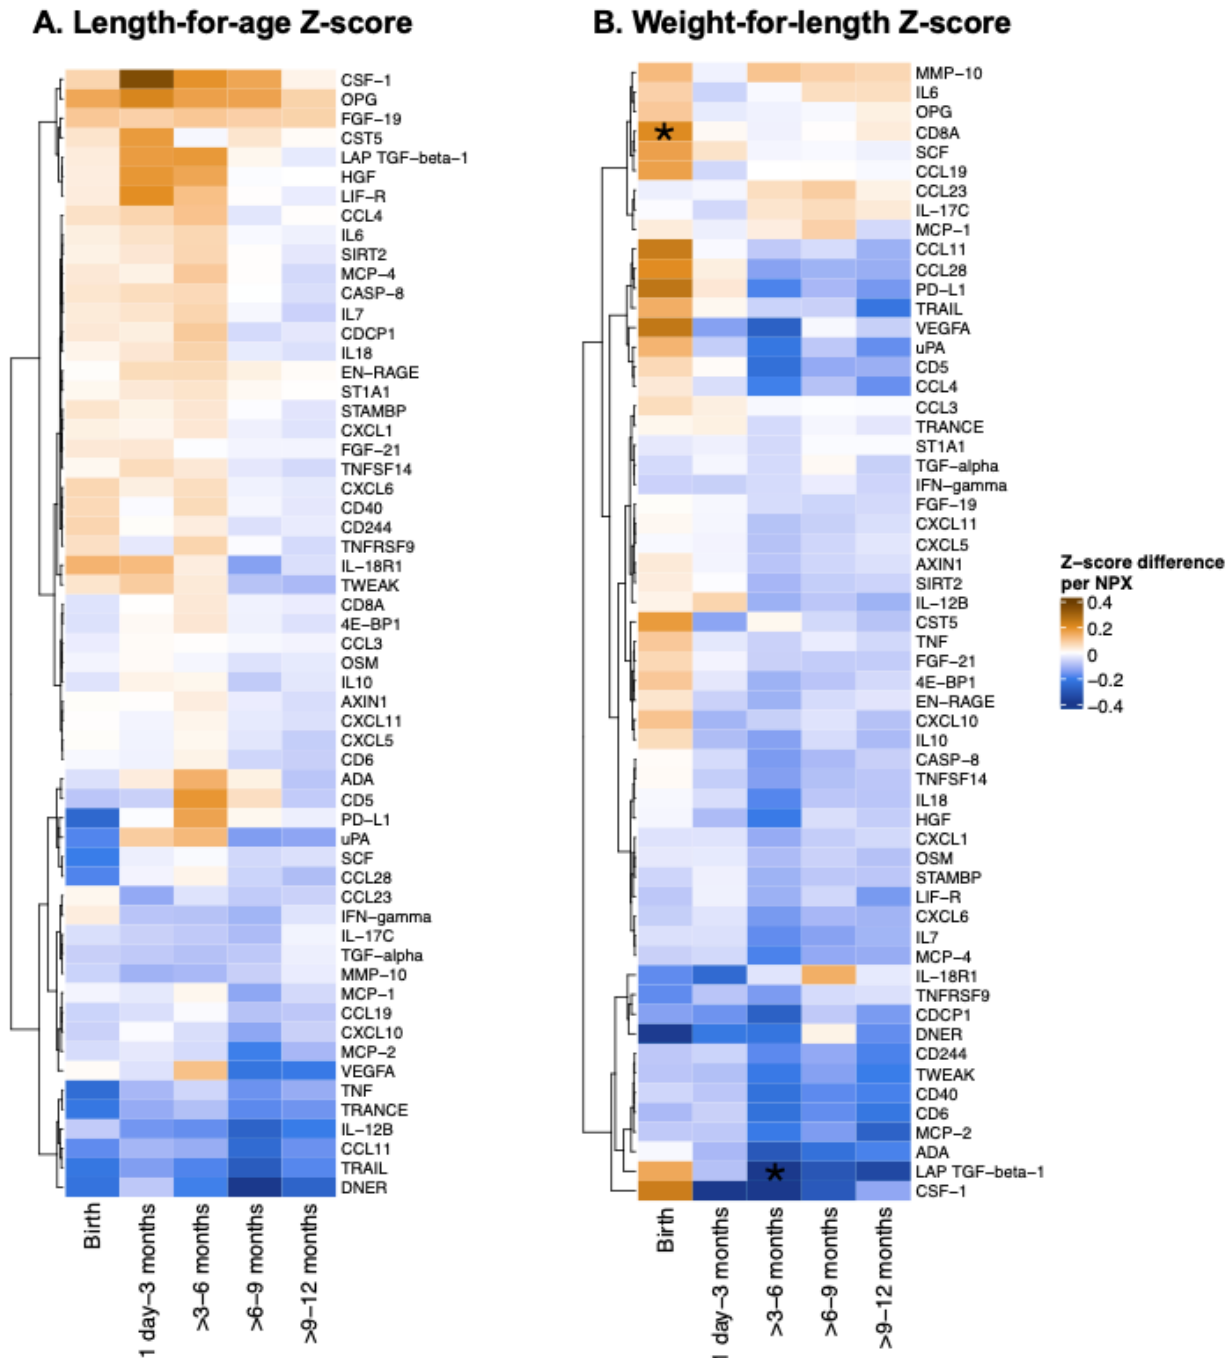

**Figure S6 Associations between maternal inflammation-related proteins at delivery and mean child growth Z-scores**

Mean Z-score differences per inflammation-related protein NPX were estimated with a model adjusted for infant sex, maternal age, gravidity, maternal baseline parasitemia, gestational age at enrollment, maternal education, household wealth.

\*Statistically significant among all gravidae after Benjamini-Hochberg correction (false discovery rate  $p$ -value < 0.05).

**Table S3. Associations between non-inflammation-related potential mediators and stunting and wasting**

|                                       | Stunting |                          | Wasting |                          |
|---------------------------------------|----------|--------------------------|---------|--------------------------|
|                                       | N        | Incidence ratio (95% CI) | N       | Incidence ratio (95% CI) |
| <b>Maternal anemia</b>                |          |                          |         |                          |
| Birth                                 | 619      | 1.07 (0.72, 1.58)        | 619     | 0.42 (0.14, 1.21)        |
| 1 day-3 months                        | 510      | 1.38 (0.95, 2.00)        | 593     | 0.93 (0.59, 1.47)        |
| >3-6 months                           | 374      | 0.83 (0.41, 1.65)        | 489     | 1.48 (0.59, 3.70)        |
| >6-9 months                           | 331      | 0.97 (0.45, 2.11)        | 459     | 1.51 (0.47, 4.91)        |
| >9-12 months                          | 296      | 0.14 (0.02, 1.11)        | 437     | 2.58 (0.74, 9.03)        |
| <b>Gestational weight change (kg)</b> |          |                          |         |                          |
| Birth                                 | 575      | 0.94 (0.85, 1.03)        | 575     | 1.05 (0.84, 1.32)        |
| 1 day-3 months                        | 486      | 0.97 (0.89, 1.05)        | 552     | 0.93 (0.84, 1.04)        |
| >3-6 months                           | 361      | 0.94 (0.81, 1.09)        | 467     | 0.99 (0.80, 1.23)        |
| >6-9 months                           | 321      | 1.06 (0.88, 1.26)        | 440     | 0.92 (0.71, 1.19)        |
| >9-12 months                          | 287      | 0.93 (0.71, 1.21)        | 419     | 1.01 (0.78, 1.33)        |
| <b>Placental malaria</b>              |          |                          |         |                          |
| Birth                                 | 633      | 1.38 (0.85, 2.25)        | 633     | 1.14 (0.35, 3.7)         |
| 1 day-3 months                        | 522      | 0.94 (0.60, 1.47)        | 607     | 0.98 (0.56, 1.73)        |
| >3-6 months                           | 379      | 1.3 (0.59, 2.86)         | 501     | 1.12 (0.35, 3.55)        |
| >6-9 months                           | 335      | 1.21 (0.51, 2.88)        | 469     | 0.81 (0.20, 3.38)        |
| >9-12 months                          | 300      | 0.22 (0.02, 1.99)        | 447     | 1.01 (0.23, 4.39)        |
| <b>Pre-term birth</b>                 |          |                          |         |                          |
| Birth                                 | 633      | 3.87 (2.29, 6.52)        | 633     | 1.01 (0.13, 7.83)        |
| 1 day-3 months                        | 522      | 2.20 (1.06, 4.56)        | 607     | 3.21 (1.71, 6.02)        |
| >3-6 months                           |          | --                       |         | --                       |
| >6-9 months                           |          | --                       | 469     | 2.85 (0.35, 23.39)       |
| >9-12 months                          |          | --                       |         | --                       |
| <b>Birth length (cm)</b>              |          |                          |         |                          |
| Birth                                 | 628      | 0.75 (0.72, 0.79)        | 628     | 1.33 (1.16, 1.53)        |
| 1 day-3 months                        | 520      | 0.86 (0.81, 0.91)        | 605     | 0.98 (0.88, 1.08)        |
| >3-6 months                           | 378      | 0.79 (0.67, 0.92)        | 500     | 0.91 (0.74, 1.12)        |
| >6-9 months                           | 334      | 0.79 (0.66, 0.93)        | 468     | 1.21 (0.87, 1.68)        |
| >9-12 months                          | 300      | 1.22 (0.87, 1.71)        | 446     | 0.9 (0.72, 1.13)         |
| <b>Birth weight (kg)</b>              |          |                          |         |                          |
| Birth                                 | 633      | 0.17 (0.12, 0.26)        | 633     | 0.15 (0.07, 0.36)        |
| 1 day-3 months                        | 522      | 0.33 (0.22, 0.51)        | 607     | 0.35 (0.21, 0.57)        |
| >3-6 months                           | 379      | 0.38 (0.15, 0.97)        | 501     | 0.48 (0.13, 1.79)        |
| >6-9 months                           | 335      | 0.27 (0.09, 0.77)        | 469     | 3.30 (0.65, 16.68)       |
| >9-12 months                          | 300      | 1.54 (0.26, 9.11)        | 447     | 0.24 (0.04, 1.38)        |

Incidence ratios for each potential mediator were adjusted by infant sex, primigravida, maternal age, maternal baseline parasitemia, gestational age at enrollment, maternal education, and household wealth.

Note: missing values were due to data sparsity.

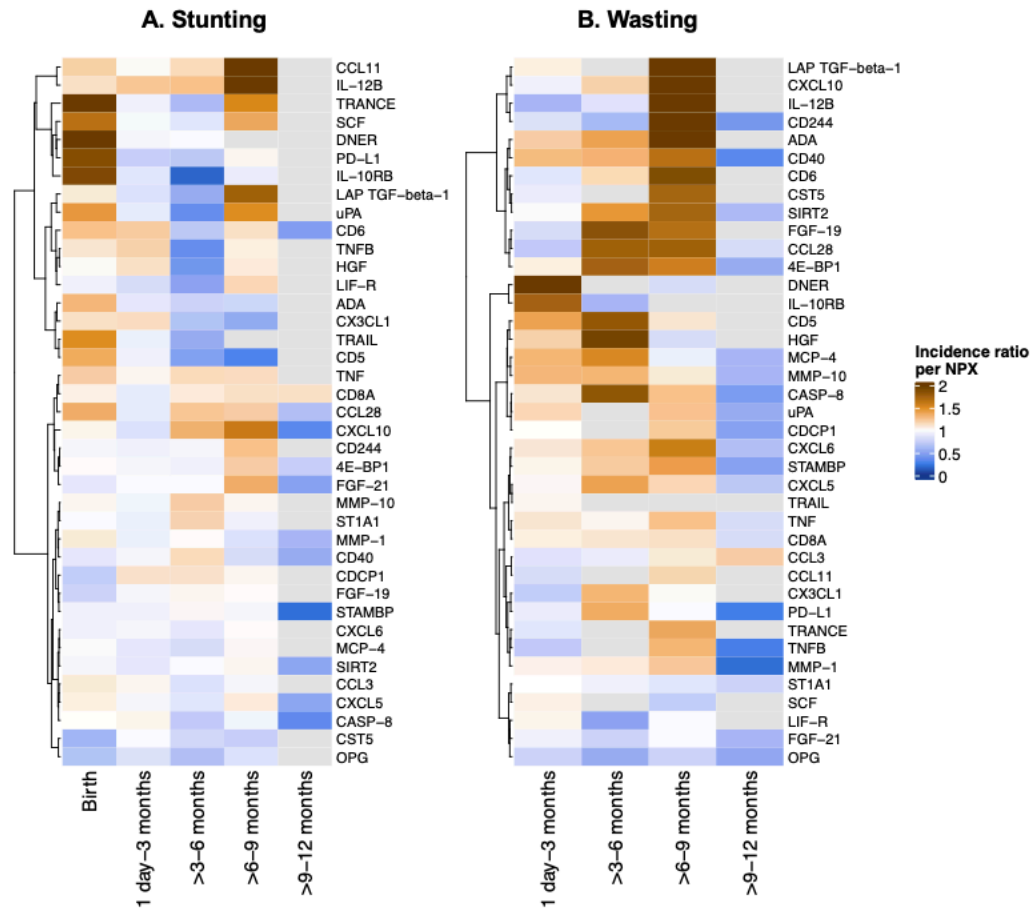

### Figure S7 Associations between potential inflammation-related protein mediators and stunting and wasting

Incidence ratios per inflammation-related protein NPX were estimated with a model adjusted by infant sex, primigravida, maternal age, maternal baseline parasitemia, gestational age at enrollment, maternal education, and household wealth. The reference group was SP. Missing point estimates were due to data sparsity and were filled as grey. When there were fewer than 10 incident cases in a certain age group, models were not fit.

### A) Stunting

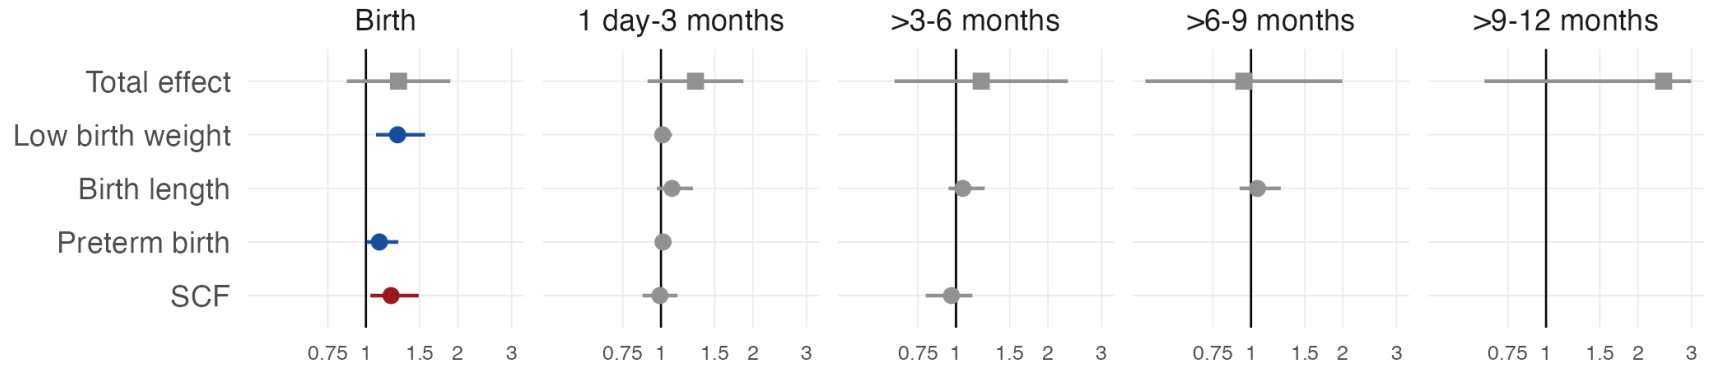

### B) Wasting

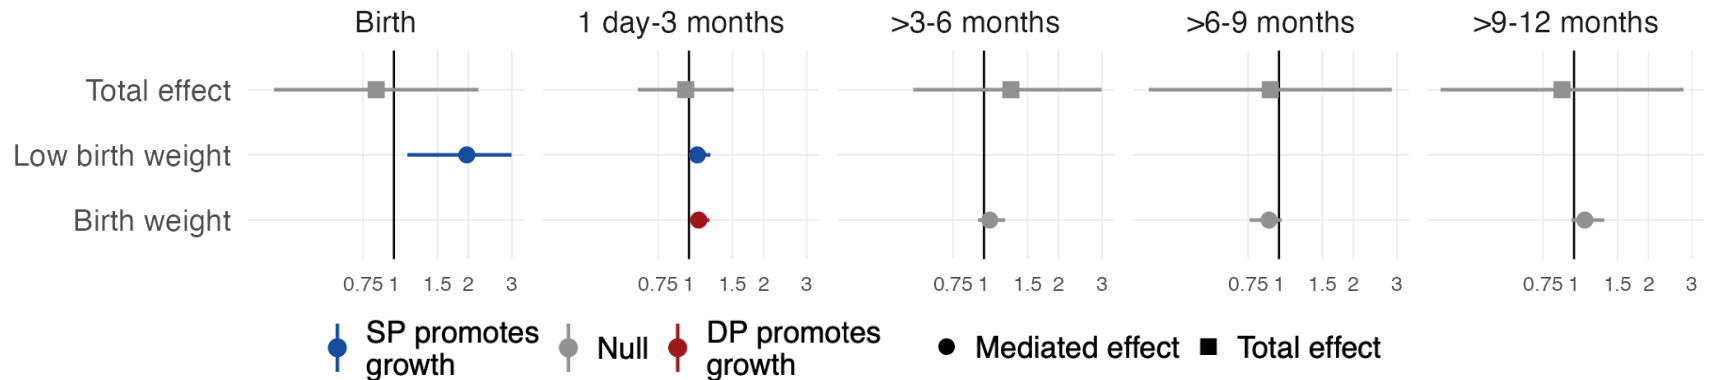

**Figure S8. Total effects and mediated effects on incidences of child stunting and wasting**

The total effects compare incidence of stunting and wasting between IPTp-DP and IPTp-SP using unadjusted models. The mediated effects were adjusted by infant sex, maternal age, maternal baseline parasitemia, gestational age at enrollment, gravidity, maternal education, and household wealth. The reference group was SP. Note: Missing point estimates were due to data sparsity. When there were fewer than 5 incident cases or 5 observed values of a binary mediator in a certain age group, models were not fit.

**Table S4. Mediated effects of IPTp-DP vs. IPTp-SP on Z-scores**

|                                       | Length-for-age Z |                               | Weight-for-length Z |                               |
|---------------------------------------|------------------|-------------------------------|---------------------|-------------------------------|
|                                       | N                | Mean difference in Z (95% CI) | N                   | Mean difference in Z (95% CI) |
| <b>Maternal anemia</b>                |                  |                               |                     |                               |
| Birth                                 | 608              | 0.0037 (-0.0077, 0.0225)      | 582                 | -0.0028 (-0.0229, 0.0103)     |
| 1 day-3 months                        | 593              | 0.0084 (-0.0116, 0.0357)      | 581                 | -0.0025 (-0.0187, 0.0082)     |
| >3-6 months                           | 575              | 0.0043 (-0.0099, 0.0244)      | 574                 | 0.0030 (-0.0091, 0.0219)      |
| >6-9 months                           | 559              | 0.0049 (-0.0099, 0.0256)      | 558                 | 0.0045 (-0.0095, 0.0264)      |
| >9-12 months                          | 548              | 0.0049 (-0.0109, 0.0245)      | 548                 | 0.0039 (-0.0106, 0.0239)      |
|                                       |                  |                               |                     |                               |
| <b>Gestational weight change (kg)</b> |                  |                               |                     |                               |
| Birth                                 | 567              | -0.0007 (-0.0182, 0.0144)     | 555                 | -0.0007 (-0.0183, 0.013)      |
| 1 day-3 months                        | 552              | -0.0036 (-0.0305, 0.0206)     | 545                 | -0.0002 (-0.0101, 0.0085)     |
| >3-6 months                           | 541              | -0.002 (-0.0264, 0.0186)      | 538                 | -0.0006 (-0.0139, 0.0092)     |
| >6-9 months                           | 526              | -0.0005 (-0.018, 0.0138)      | 525                 | -0.0006 (-0.0177, 0.0137)     |
| >9-12 months                          | 515              | 0.0004 (-0.0161, 0.0157)      | 515                 | 0.0002 (-0.0132, 0.0112)      |
|                                       |                  |                               |                     |                               |
| <b>Placental malaria</b>              |                  |                               |                     |                               |
| Birth                                 | 622              | 0.0358 (-0.0318, 0.1055)      | 596                 | 0.0903 (-0.002, 0.183)        |
| 1 day-3 months                        | 607              | 0.0049 (-0.0625, 0.0691)      | 594                 | 0.0414 (-0.0285, 0.1114)      |
| >3-6 months                           | 587              | 0.0003 (-0.075, 0.0708)       | 586                 | 0.0057 (-0.0706, 0.0805)      |
| >6-9 months                           | 569              | -0.0152 (-0.0897, 0.0545)     | 568                 | 0.0024 (-0.0727, 0.0782)      |
| >9-12 months                          | 558              | -0.0059 (-0.0745, 0.0588)     | 558                 | -0.0040 (-0.0778, 0.0691)     |
|                                       |                  |                               |                     |                               |
| <b>Pre-term birth</b>                 |                  |                               |                     |                               |
| Birth                                 | 622              | 0.0098 (-0.0645, 0.0909)      | 596                 | 0.0087 (-0.0252, 0.0511)      |
| 1 day-3 months                        | 607              | 0.0097 (-0.0695, 0.0916)      | 594                 | 0.0005 (-0.0143, 0.0161)      |
| >3-6 months                           | 587              | 0.0134 (-0.024, 0.0656)       | 586                 | -0.0013 (-0.0253, 0.0206)     |
| >6-9 months                           | 569              | 0.0112 (-0.0217, 0.0569)      | 568                 | -0.0017 (-0.0229, 0.0147)     |
| >9-12 months                          | 558              | 0.0087 (-0.0159, 0.0433)      | 558                 | -0.0033 (-0.0245, 0.0109)     |
|                                       |                  |                               |                     |                               |
| <b>Birth length (cm)</b>              |                  |                               |                     |                               |
| Birth                                 | 622              | -0.2522 (-0.4108, -0.0899)    | 596                 | 0.0883 (0.0223, 0.1575)       |
| 1 day-3 months                        | 605              | -0.1235 (-0.2265, -0.0319)    | 592                 | 0.0231 (0.0026, 0.0551)       |
| >3-6 months                           | 585              | -0.0815 (-0.1562, -0.0184)    | 584                 | -0.0035 (-0.026, 0.017)       |
| >6-9 months                           | 567              | -0.0801 (-0.1586, -0.0099)    | 566                 | -0.0050 (-0.0254, 0.0123)     |
| >9-12 months                          | 557              | -0.062 (-0.1269, -0.0036)     | 557                 | -0.0125 (-0.0384, 0.0027)     |
|                                       |                  |                               |                     |                               |
| <b>Birth weight (kg)</b>              |                  |                               |                     |                               |
| Birth                                 | 622              | -0.1115 (-0.2032, -0.023)     | 596                 | -0.149 (-0.2817, -0.0167)     |
| 1 day-3 months                        | 607              | -0.1119 (-0.2058, -0.0207)    | 594                 | -0.038 (-0.0786, -0.0045)     |
| >3-6 months                           | 587              | -0.0695 (-0.1444, 0.0009)     | 586                 | -0.0189 (-0.0499, 0.0037)     |
| >6-9 months                           | 569              | -0.0623 (-0.1333, 0.0031)     | 568                 | -0.0222 (-0.0541, 0.0005)     |
| >9-12 months                          | 558              | -0.0421 (-0.0943, 0.0059)     | 558                 | -0.0293 (-0.0707, 0.0036)     |
|                                       |                  |                               |                     |                               |
| <b>CD6</b>                            |                  |                               |                     |                               |
| Birth                                 | 255              | 0.0026 (-0.0485, 0.0519)      | 245                 | 0.0247 (-0.0221, 0.0853)      |
| 1 day-3 months                        | 251              | 0.0047 (-0.0447, 0.0561)      | 247                 | 0.0173 (-0.0257, 0.0734)      |
| >3-6 months                           | 255              | -0.0056 (-0.0651, 0.049)      | 255                 | 0.0609 (0.0037, 0.1464)       |
| >6-9 months                           | 255              | 0.0158 (-0.0361, 0.0765)      | 254                 | 0.0440 (-0.0056, 0.1172)      |



|                |     |                            |     |                           |
|----------------|-----|----------------------------|-----|---------------------------|
| >9-12 months   | 255 | 0.0183 (-0.0237, 0.0704)   | 255 | 0.0575 (0.0032, 0.1392)   |
|                |     |                            |     |                           |
| CDCP1          |     |                            |     |                           |
| Birth          | 255 | -0.008 (-0.0500, 0.0274)   | 245 | 0.0291 (-0.0115, 0.0911)  |
| 1 day-3 months | 251 | -0.0053 (-0.0512, 0.0351)  | 247 | 0.0319 (-0.0040, 0.0874)  |
| >3-6 months    | 255 | -0.0196 (-0.0779, 0.0243)  | 255 | 0.0584 (0.0056, 0.1341)   |
| >6-9 months    | 255 | 0.0111 (-0.032, 0.0643)    | 254 | 0.0154 (-0.0227, 0.0643)  |
| >9-12 months   | 255 | 0.0071 (-0.0321, 0.0496)   | 255 | 0.0316 (-0.0115, 0.0965)  |
|                |     |                            |     |                           |
| DNER           |     |                            |     |                           |
| Birth          | 255 | -0.0233 (-0.0734, 0.0107)  | 245 | -0.0386 (-0.1157, 0.0088) |
| 1 day-3 months | 251 | -0.0077 (-0.0532, 0.0312)  | 247 | -0.0200 (-0.0668, 0.0095) |
| >3-6 months    | 255 | -0.0202 (-0.0785, 0.0234)  | 255 | -0.023 (-0.0805, 0.0173)  |
| >6-9 months    | 255 | -0.0458 (-0.1128, -0.0026) | 254 | 0.0024 (-0.0404, 0.0461)  |
| >9-12 months   | 255 | -0.0277 (-0.0798, 0.0054)  | 255 | -0.0177 (-0.0699, 0.0215) |
|                |     |                            |     |                           |
| IL18           |     |                            |     |                           |
| Birth          | 255 | -0.0095 (-0.0678, 0.0465)  | 245 | 0.0046 (-0.0630, 0.0784)  |
| 1 day-3 months | 251 | -0.0199 (-0.0822, 0.0362)  | 247 | 0.0237 (-0.0248, 0.0838)  |
| >3-6 months    | 255 | -0.0374 (-0.1161, 0.0281)  | 255 | 0.0890 (0.0234, 0.1738)   |
| >6-9 months    | 255 | 0.0139 (-0.0470, 0.0840)   | 254 | 0.0393 (-0.0126, 0.1082)  |
| >9-12 months   | 255 | 0.0219 (-0.0291, 0.0792)   | 255 | 0.0408 (-0.0076, 0.1038)  |
|                |     |                            |     |                           |
| OPG            |     |                            |     |                           |
| Birth          | 255 | 0.0384 (-0.0049, 0.1003)   | 245 | 0.0235 (-0.0239, 0.0839)  |
| 1 day-3 months | 251 | 0.0543 (0.0057, 0.1243)    | 247 | -0.0077 (-0.0583, 0.0418) |
| >3-6 months    | 255 | 0.0419 (-0.0025, 0.106)    | 255 | -0.0044 (-0.0573, 0.0497) |
| >6-9 months    | 255 | 0.0408 (-0.0026, 0.1041)   | 254 | -0.0023 (-0.0559, 0.0538) |
| >9-12 months   | 255 | 0.0196 (-0.0228, 0.0747)   | 255 | 0.0068 (-0.0395, 0.0594)  |
|                |     |                            |     |                           |
| SCF            |     |                            |     |                           |
| Birth          | 255 | -0.0706 (-0.1404, -0.0161) | 245 | 0.0592 (-0.0082, 0.1535)  |
| 1 day-3 months | 251 | -0.0071 (-0.0587, 0.0435)  | 247 | 0.0166 (-0.0342, 0.0787)  |
| >3-6 months    | 255 | -0.0022 (-0.0658, 0.0646)  | 255 | -0.0043 (-0.0696, 0.0641) |
| >6-9 months    | 255 | -0.0192 (-0.0874, 0.0463)  | 254 | -0.0023 (-0.0660, 0.0652) |
| >9-12 months   | 255 | -0.0152 (-0.0689, 0.0361)  | 255 | -0.0063 (-0.0699, 0.0581) |

Mediated effects were adjusted for infant sex, primigravida, maternal age, maternal baseline parasitemia, gestational age at enrollment, maternal education, and household wealth. Analysis includes all gravidae. The reference group was SP.

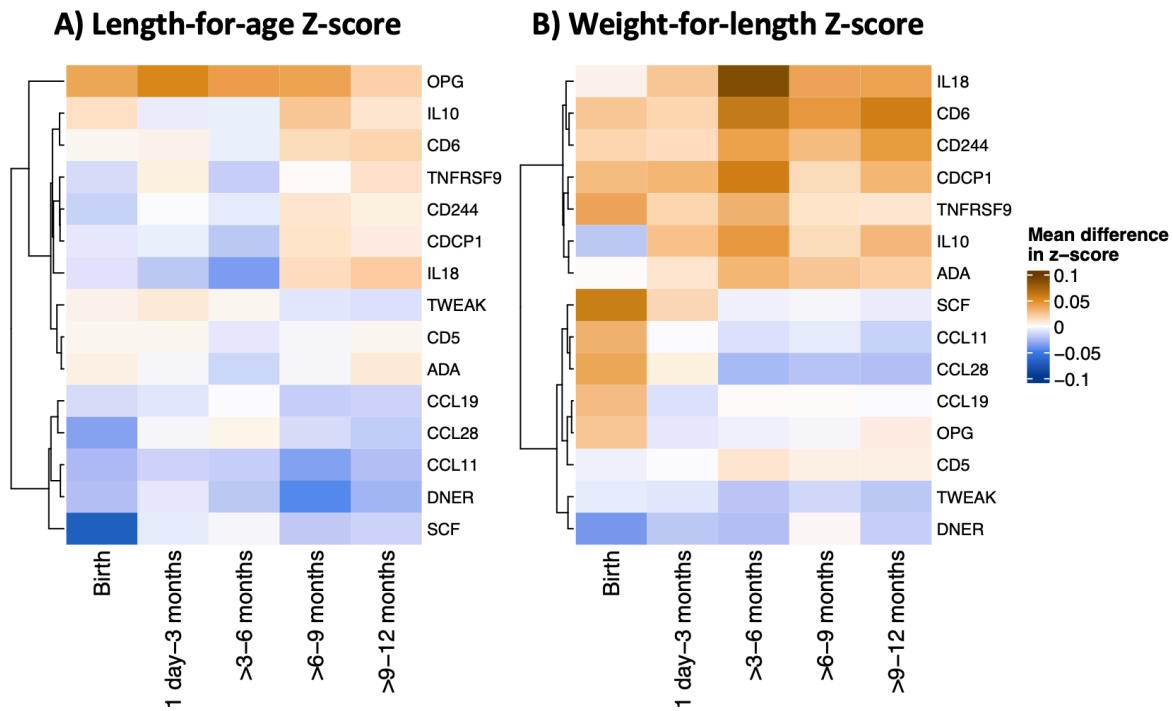

**Figure S9 Inflammation-related protein-mediated effects of IPTp-DP vs. IPTp-SP on Z-scores**

Mediated effects were adjusted by infant sex, primigravida, maternal age, maternal baseline parasitemia, gestational age at enrollment, maternal education, and household wealth. Analysis includes all gravidae. The reference group was SP.

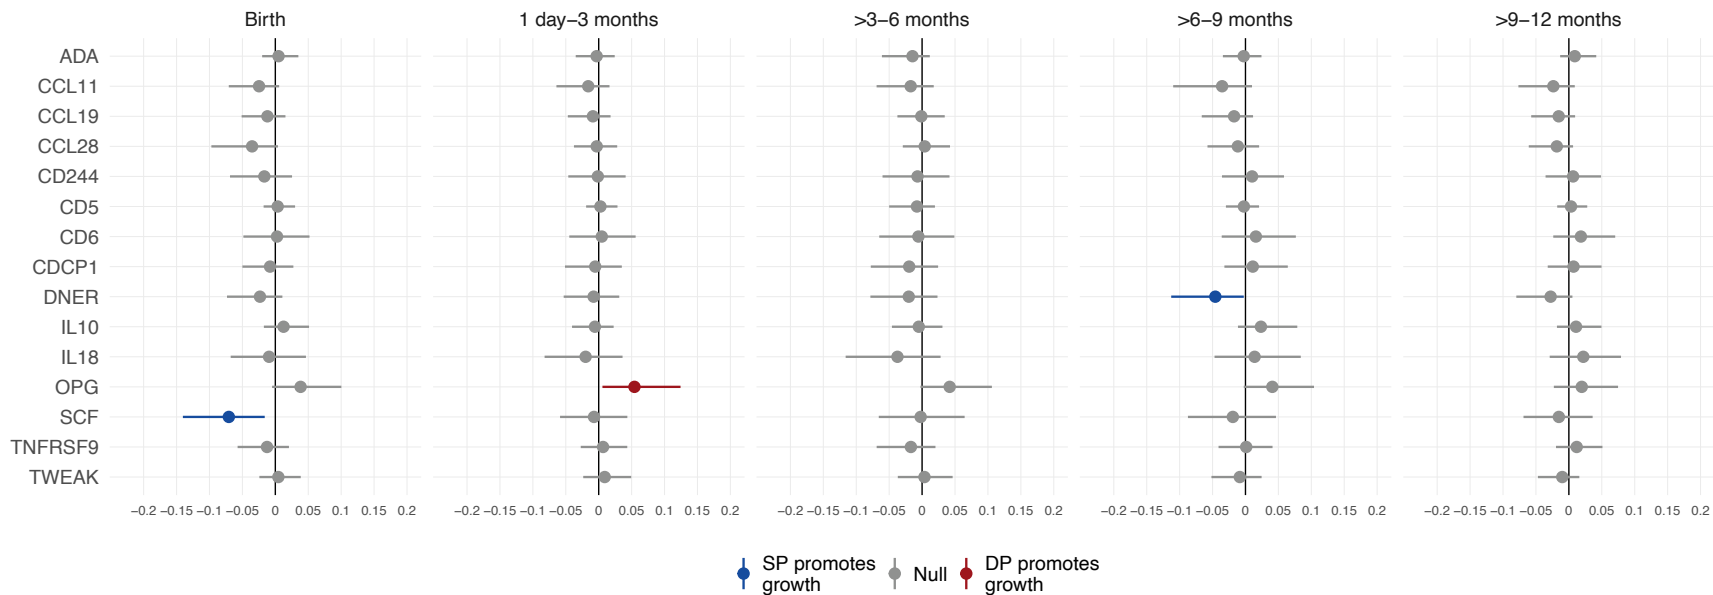

**Figure S10 Inflammation-related protein-mediated effects on length-for-age Z**

Mediated effects were adjusted for infant sex, maternal age, gravidity, maternal baseline parasitemia, gestational age at enrollment, maternal education, and household wealth. Analysis includes all gravidae. The reference group was SP.

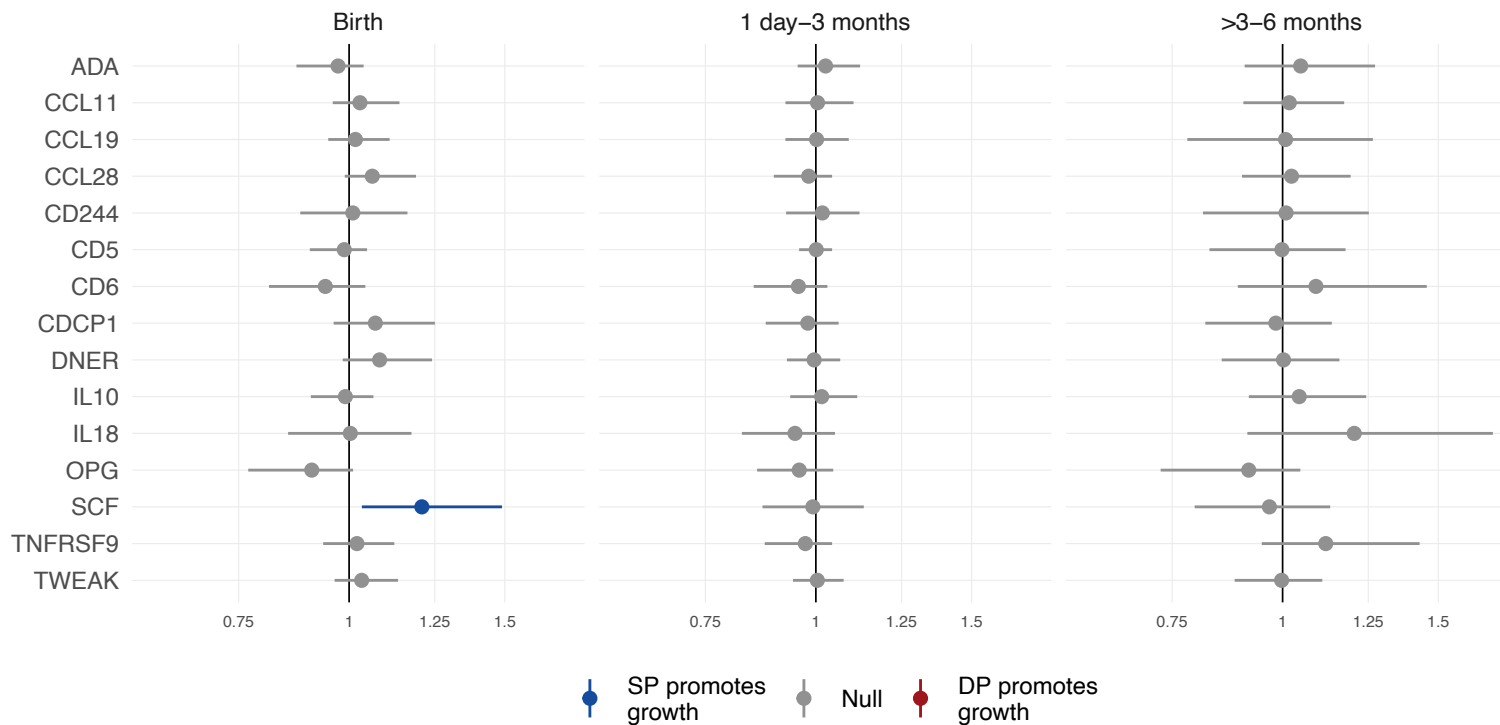

**Figure S11 Inflammation-related protein-mediated effects on child stunting**

Mediated effects were adjusted by infant sex, gravidity, maternal age, maternal baseline parasitemia, gestational age at enrollment, maternal education, and household wealth. Mediation models were only fit from birth through age 6 months due to data sparsity at other ages. Analysis includes all gravidae. The reference group was SP.

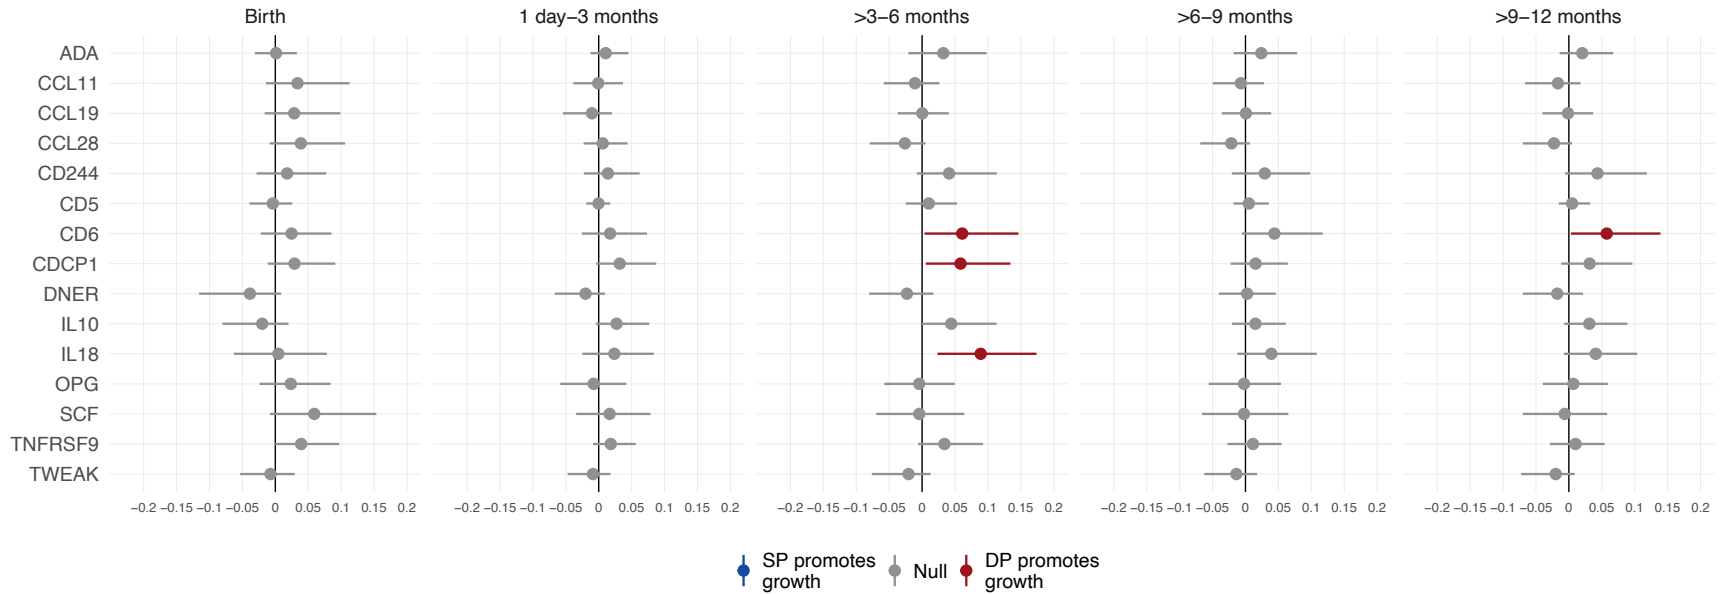

**Figure S12 Inflammation-related protein-mediated effects on weight-for-length Z**

Mediated effects were adjusted by infant sex, gravidity, maternal age, maternal baseline parasitemia, gestational age at enrollment, maternal education, and household wealth. Analysis includes all gravidae. The reference group was SP.

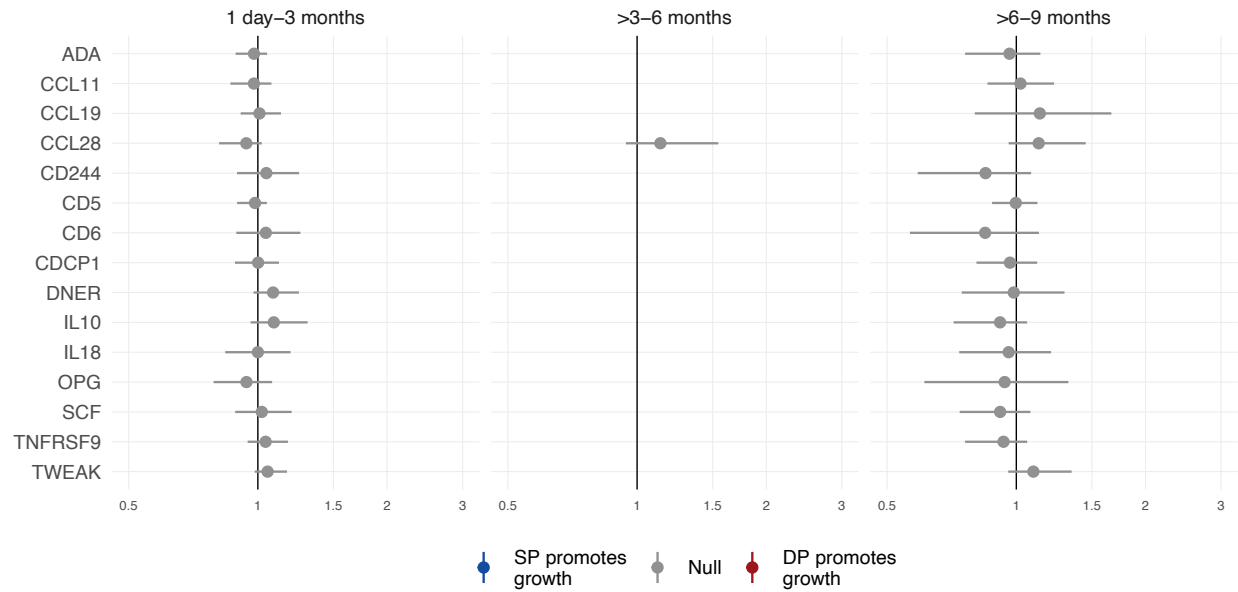

### Figure S13 Inflammation-related protein-mediated effects on child wasting

Mediated effects were adjusted by infant sex, gravidity, maternal age, maternal baseline parasitemia, gestational age at enrollment, maternal education, and household wealth. Analysis includes all gravidae. The reference group was SP. Mediation models did not fit at birth or >9-12 months due to data sparsity.
